# Supplementary material
Source: Royal Society of Chemistry journal article supplement (doi:10.1039/d6lc00096g)
Supplement: d6lc00096g7.xlsx [file d6lc00096g7.xlsx]

## Sheet: Fig. 5f
Experimental ID	Group	Permeability (cm/s)
Exp_01	Planar	1.90 × 10-7
Exp_02	Planar	1.67 × 10-7
Exp_03	Planar	1.60 × 10-7
Exp_04	Planar	1.29 × 10-7
Exp_05	Planar	1.17 × 10-7
Exp_06	Crypt-pattern	2.33 × 10-7
Exp_07	Crypt-pattern	2.48 × 10-7
Exp_08	Crypt-pattern	2.50 × 10-7
Exp_09	Crypt-pattern	2.71 × 10-7
Exp_10	Crypt-pattern	3.08 × 10-7

## Sheet: Fig. 6c
Experimental ID	Colonic topography	LPS testing	Vessel coverage area (mm2)
Exp_01	Crypt	Control	0.849
Exp_02	Crypt	Control	0.932
Exp_03	Crypt	Control	0.797
Exp_04	Crypt	Treated	0.635
Exp_05	Crypt	Treated	0.662
Exp_06	Crypt	Treated	0.708
Exp_07	Planar	Control	0.816
Exp_08	Planar	Control	0.963
Exp_09	Planar	Control	0.871
Exp_10	Planar	Treated	0.74
Exp_11	Planar	Treated	0.779
Exp_12	Planar	Treated	0.788

## Sheet: Fig. 6d
Experimental ID	Colonic topography	LPS testing	Number of junctions
Exp_01	Crypt	Control	850
Exp_02	Crypt	Control	747
Exp_03	Crypt	Control	821
Exp_04	Crypt	Treated	457
Exp_05	Crypt	Treated	528
Exp_06	Crypt	Treated	544
Exp_07	Planar	Control	873
Exp_08	Planar	Control	792
Exp_09	Planar	Control	832
Exp_10	Planar	Treated	523
Exp_11	Planar	Treated	571
Exp_12	Planar	Treated	549

## Sheet: Fig. 6e
Experimental ID	Colonic topography	LPS testing	Vessel diamater (μm)
Exp_01	Crypt	Control	17.37
Exp_02	Crypt	Control	18.12
Exp_03	Crypt	Control	19.83
Exp_04	Crypt	Treated	8.84
Exp_05	Crypt	Treated	9.74
Exp_06	Crypt	Treated	10.21
Exp_07	Planar	Control	16.49
Exp_08	Planar	Control	17.24
Exp_09	Planar	Control	18.01
Exp_10	Planar	Treated	8.99
Exp_11	Planar	Treated	9.45
Exp_12	Planar	Treated	9.82

## Sheet: Fig. 6f
Experimental ID	Colonic topography	LPS testing	Permeability (cm/s)
Exp_01	Crypt	Control	2.12 × 10-7
Exp_02	Crypt	Control	3.01 × 10-7
Exp_03	Crypt	Control	2.42 × 10-7
Exp_04	Crypt	Control	2.54 × 10-7
Exp_05	Crypt	Control	2.69 × 10-7
Exp_06	Crypt	Treated	6.83 × 10-7
Exp_07	Crypt	Treated	6.27 × 10-7
Exp_08	Crypt	Treated	5.8 × 10-7
Exp_09	Crypt	Treated	6.39 × 10-7
Exp_10	Crypt	Treated	6.67 × 10-7
Exp_11	Planar	Control	1.56 × 10-7
Exp_12	Planar	Control	1.70 × 10-7
Exp_13	Planar	Control	1.36 × 10-7
Exp_14	Planar	Control	1.86 × 10-7
Exp_15	Planar	Control	1.51 × 10-7
Exp_16	Planar	Treated	5.09 × 10-7
Exp_17	Planar	Treated	5.16 × 10-7
Exp_18	Planar	Treated	5.30 × 10-7
Exp_19	Planar	Treated	4.69 × 10-7
Exp_20	Planar	Treated	4.83 × 10-7
